# Supplementary material for: Next Generation Sequencing-Based Analysis of Repetitive DNA in the Model Dioceous Plant Silene latifolia
Source: PubMed Central journal article supplement (PMC3212565; doi:10.1371/journal.pone.0027335), 2011-11-09
Supplement: pone.0027335.s001.pdf [file pone.0027335.s001.pdf]

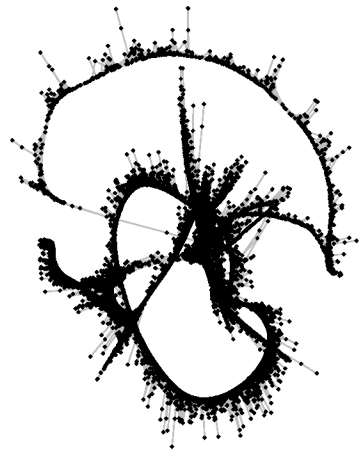

**CL1**

Ty1-copia/Angela  
Number of reads:42110 (6.3%)  
Number of pairs: 5574882  
Density: 0.006288  
Mean edge weight: 88269  
Max. degree: 1443

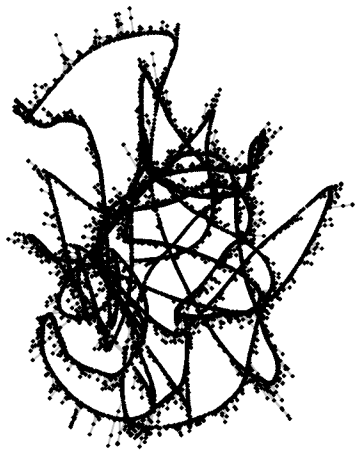

**CL2**

plastid DNA  
Number of reads:34044 (5.1%)  
Number of pairs: 957451  
Density: 0.001652  
Mean edge weight: 157260  
Max. degree: 140

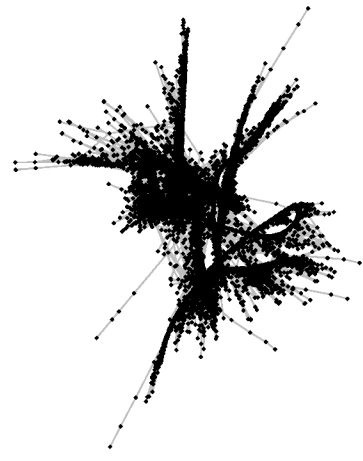

**CL3**

Ty3-gypsy/Athila  
Number of reads:31762 (4.7%)  
Number of pairs: 3463680  
Density: 0.006867  
Mean edge weight: 86300  
Max. degree: 1150

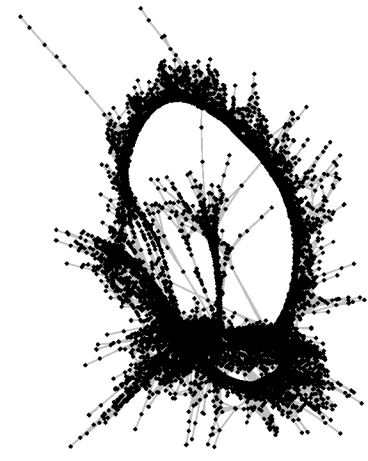

**CL4**

Ty3-gypsy/Tekay  
Number of reads:27480 (4.1%)  
Number of pairs: 1309810  
Density: 0.003469  
Mean edge weight: 78301  
Max. degree: 861

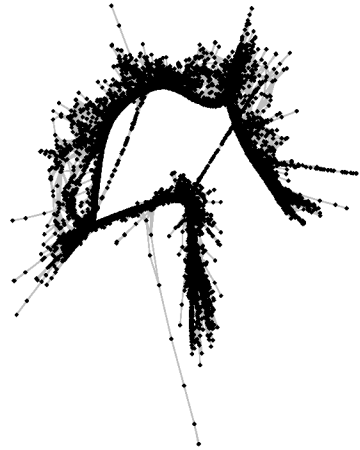

**CL5**

Ty3-gypsy/Ogre  
Number of reads:24676 (3.7%)  
Number of pairs: 2122772  
Density: 0.006973  
Mean edge weight: 82319  
Max. degree: 1312

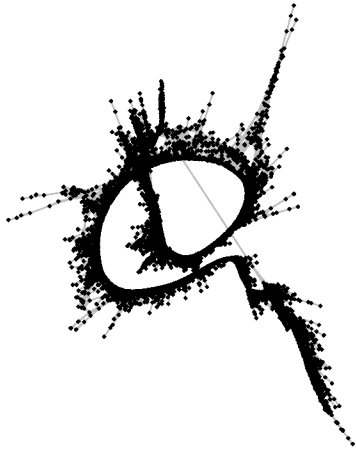

**CL6**

Ty3-gypsy/Ogre  
Number of reads:21369 (3.2%)  
Number of pairs: 1205001  
Density: 0.005278  
Mean edge weight: 86789  
Max. degree: 590

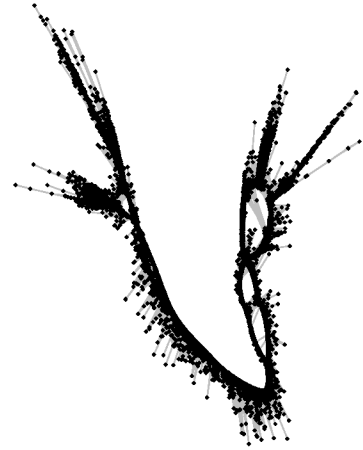

**CL7**

Ty1-copia/Angela  
Number of reads:20948 (3.1%)  
Number of pairs: 2495607  
Density: 0.01137  
Mean edge weight: 92990  
Max. degree: 603

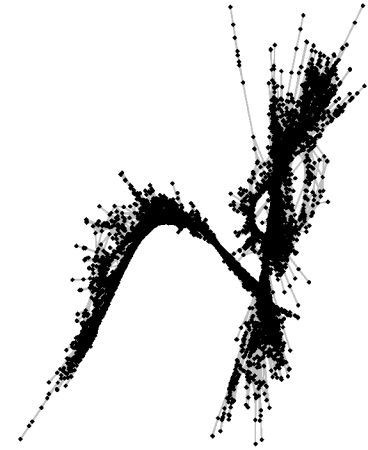

**CL8**

Ty3-gypsy/Ogre  
Number of reads:16106 (2.4%)  
Number of pairs: 1041280  
Density: 0.008029  
Mean edge weight: 84269  
Max. degree: 831

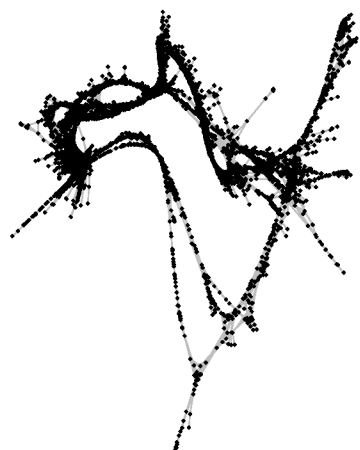

**CL9**

Ty3-gypsy/Tat/Retand  
Number of reads:10138 (1.5%)  
Number of pairs: 238952  
Density: 0.00465  
Mean edge weight: 78567  
Max. degree: 305

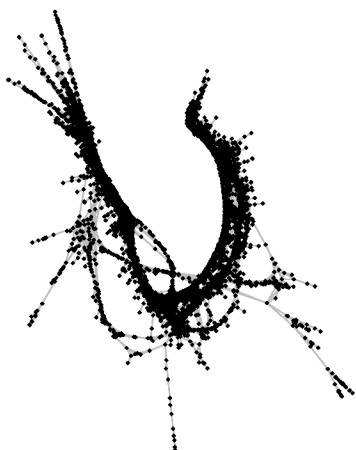

**CL10**

Ty3-gypsy/Athila  
Number of reads:9643 (1.4%)  
Number of pairs: 190083  
Density: 0.004089  
Mean edge weight: 77025  
Max. degree: 332

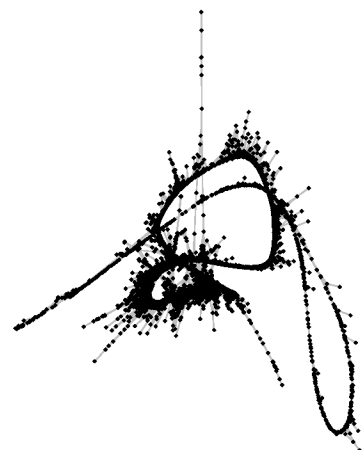

**CL11**

Ty3-gypsy/Ogre  
Number of reads:9574 (1.4%)  
Number of pairs: 456941  
Density: 0.009971  
Mean edge weight: 103220  
Max. degree: 389

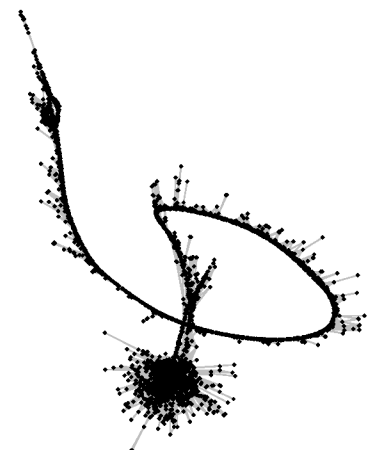

**CL12**

rDNA+satellite(X43.1)  
Number of reads:9285 (1.4%)  
Number of pairs: 2270308  
Density: 0.05267  
Mean edge weight: 80392  
Max. degree: 2308

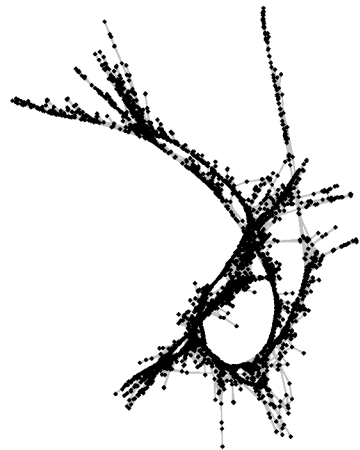

**CL13**

Ty3-gypsy  
 Number of reads:6023 (0.9%)  
 Number of pairs: 199713  
 Density: 0.01101  
 Mean edge weight: 102080  
 Max. degree: 324

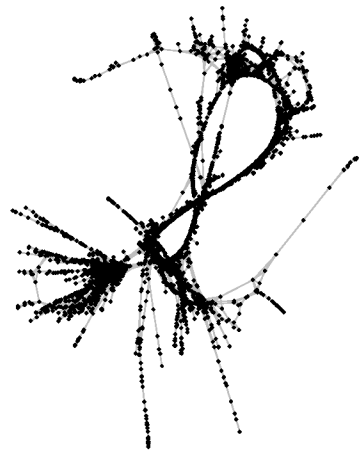

**CL14**

Ty3-gypsy  
 Number of reads:5947 (0.88%)  
 Number of pairs: 92260  
 Density: 0.005218  
 Mean edge weight: 88549  
 Max. degree: 153

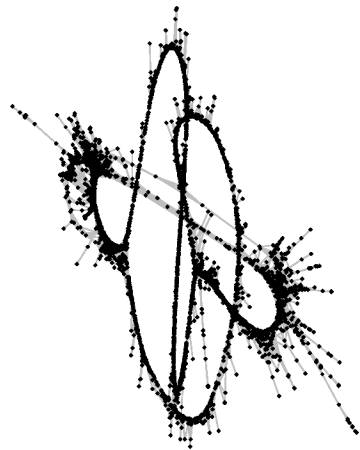

**CL15**

Ty1-copia/Angela  
 Number of reads:5170 (0.77%)  
 Number of pairs: 154945  
 Density: 0.0116  
 Mean edge weight: 98653  
 Max. degree: 224

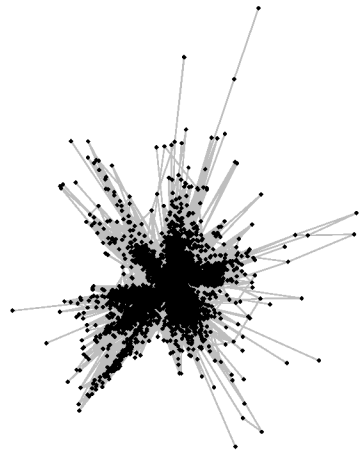

**CL16**

satellite (STAR)  
 Number of reads:5162 (0.77%)  
 Number of pairs: 542665  
 Density: 0.04074  
 Mean edge weight: 53335  
 Max. degree: 2073

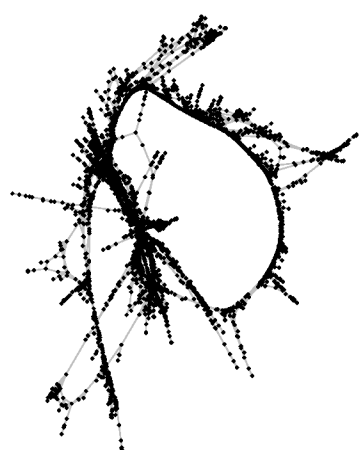

**CL17**

Ty3-gypsy/Tekay  
 Number of reads:5161 (0.77%)  
 Number of pairs: 61917  
 Density: 0.00465  
 Mean edge weight: 80566  
 Max. degree: 243

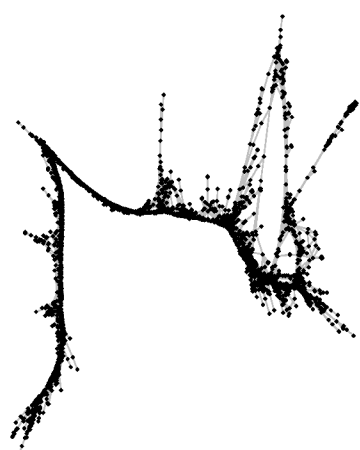

**CL18**

Ty1-copia/Maximus-SIRE  
 Number of reads:3941 (0.59%)  
 Number of pairs: 72674  
 Density: 0.009361  
 Mean edge weight: 90927  
 Max. degree: 189

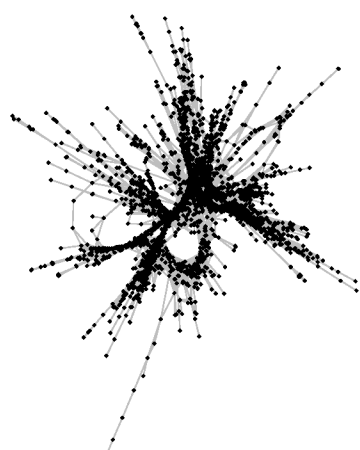

**CL19**

unclassified  
 Number of reads:3927 (0.58%)  
 Number of pairs: 111582  
 Density: 0.01447  
 Mean edge weight: 80202  
 Max. degree: 278

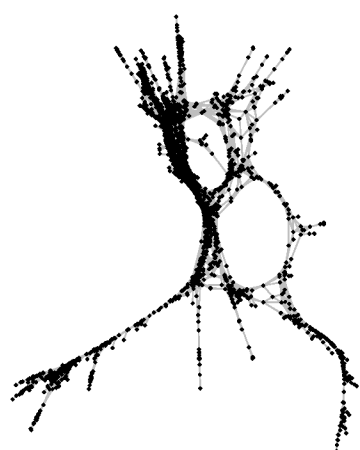

**CL20**

Ty3-gypsy/Athila  
 Number of reads:3676 (0.55%)  
 Number of pairs: 69538  
 Density: 0.01029  
 Mean edge weight: 89717  
 Max. degree: 155

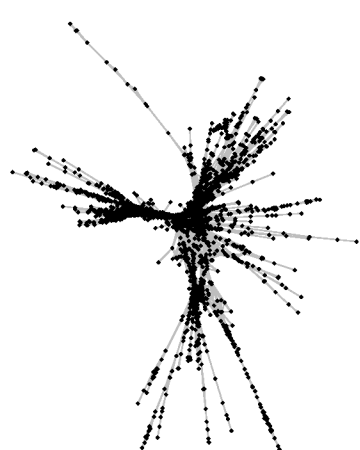

**CL21**

unclassified  
 Number of reads:3228 (0.48%)  
 Number of pairs: 96636  
 Density: 0.01855  
 Mean edge weight: 69231  
 Max. degree: 324

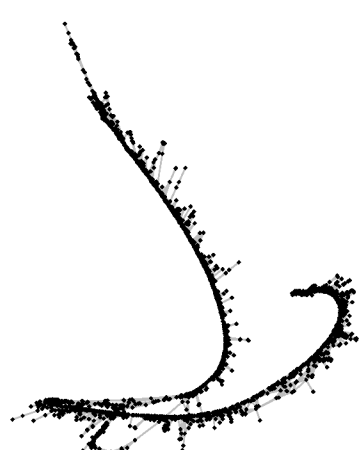

**CL22**

DNA transp/CACTA  
 Number of reads:3076 (0.46%)  
 Number of pairs: 64548  
 Density: 0.01365  
 Mean edge weight: 111600  
 Max. degree: 91

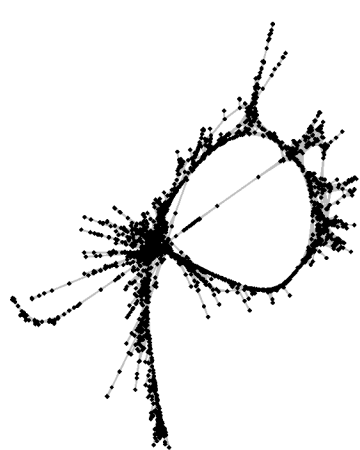

**CL23**

Ty3-gypsy/Athila  
 Number of reads:2982 (0.44%)  
 Number of pairs: 42596  
 Density: 0.009584  
 Mean edge weight: 84870  
 Max. degree: 249

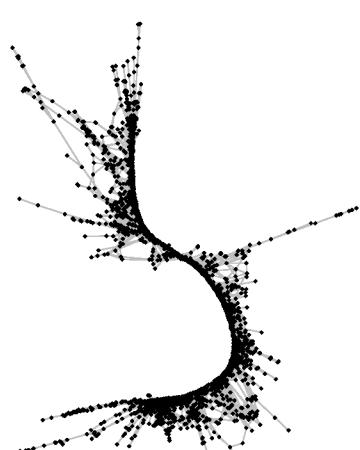

**CL24**

Ty3-gypsy/Athila  
 Number of reads:2926 (0.44%)  
 Number of pairs: 75881  
 Density: 0.01773  
 Mean edge weight: 81911  
 Max. degree: 140

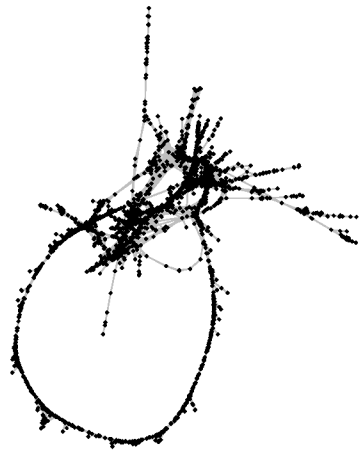

**CL25**

Ty3-gypsy/Tekay  
 Number of reads:2926 (0.44%)  
 Number of pairs: 32997  
 Density: 0.007711  
 Mean edge weight: 96537  
 Max. degree: 85

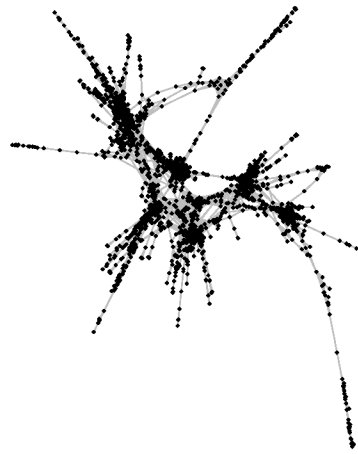

**CL26**

Ty1-copia/Angela  
 Number of reads:2842 (0.42%)  
 Number of pairs: 25196  
 Density: 0.006241  
 Mean edge weight: 83718  
 Max. degree: 121

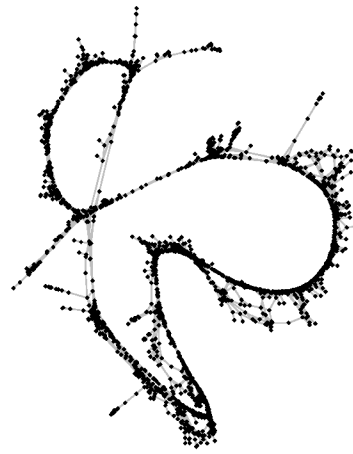

**CL27**

Ty3-gypsy/Tat  
 Number of reads:2561 (0.38%)  
 Number of pairs: 26561  
 Density: 0.008103  
 Mean edge weight: 76975  
 Max. degree: 71

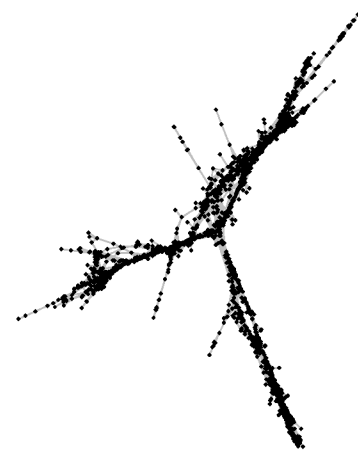

**CL28**

Ty1-copia/Angela  
 Number of reads:2254 (0.34%)  
 Number of pairs: 31897  
 Density: 0.01256  
 Mean edge weight: 73806  
 Max. degree: 140

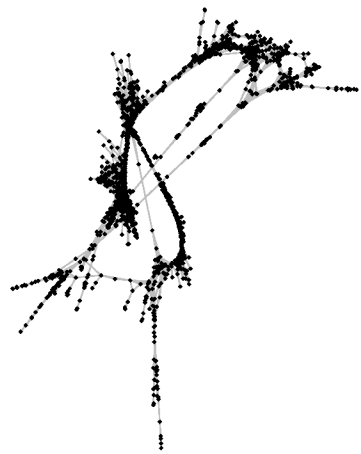

**CL29**

unclassified  
 Number of reads:2165 (0.32%)  
 Number of pairs: 32545  
 Density: 0.01389  
 Mean edge weight: 78034  
 Max. degree: 203

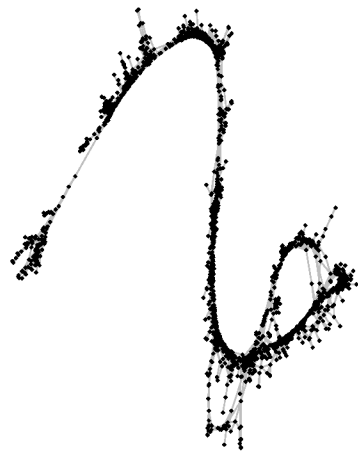

**CL30**

Ty3-gypsy/Ogre  
 Number of reads:2109 (0.31%)  
 Number of pairs: 23725  
 Density: 0.01067  
 Mean edge weight: 72589  
 Max. degree: 93

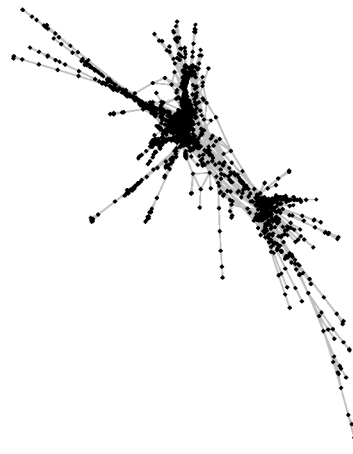

**CL31**

unclassified  
 Number of reads:2103 (0.31%)  
 Number of pairs: 44915  
 Density: 0.02032  
 Mean edge weight: 100260  
 Max. degree: 258

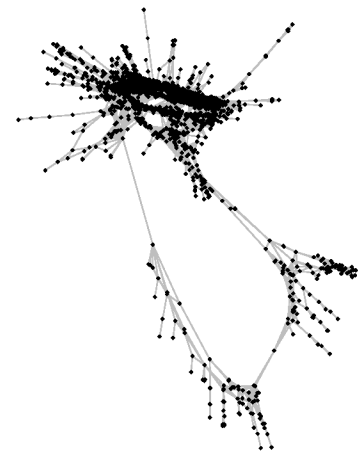

**CL32**

Ty3-gypsy/Ogre  
 Number of reads:2092 (0.31%)  
 Number of pairs: 37283  
 Density: 0.01705  
 Mean edge weight: 77734  
 Max. degree: 150

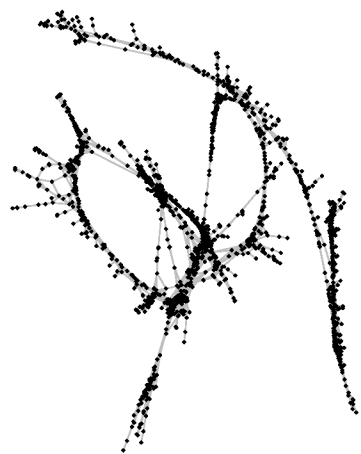

**CL33**

Ty3-gypsy/Athila  
 Number of reads:2014 (0.3%)  
 Number of pairs: 16060  
 Density: 0.007923  
 Mean edge weight: 81752  
 Max. degree: 97

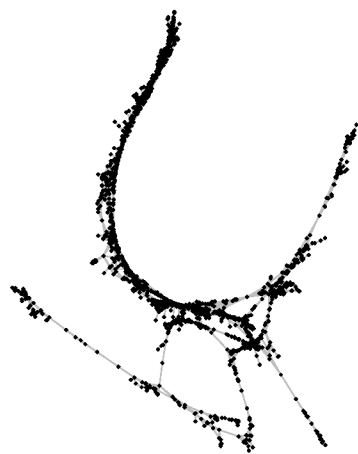

**CL34**

Ty1-copia/Angela  
 Number of reads:2007 (0.3%)  
 Number of pairs: 16250  
 Density: 0.008072  
 Mean edge weight: 78077  
 Max. degree: 74

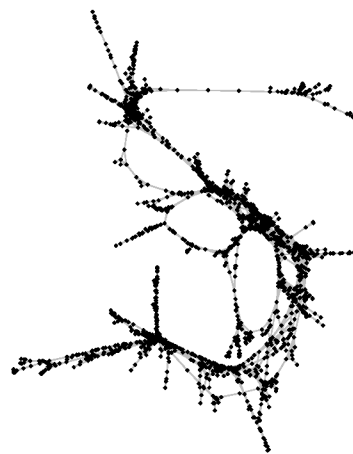

**CL35**

unclassified  
 Number of reads:1997 (0.3%)  
 Number of pairs: 13093  
 Density: 0.006569  
 Mean edge weight: 81677  
 Max. degree: 83

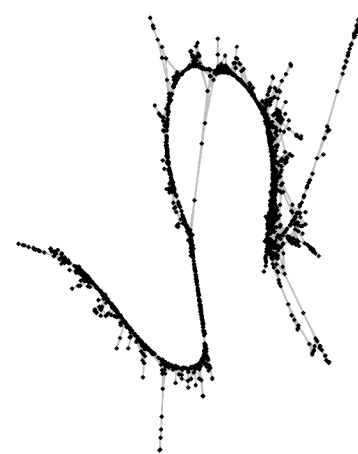

**CL36**

Ty1-copia/Maximus-SIRE  
 Number of reads:1953 (0.29%)  
 Number of pairs: 22869  
 Density: 0.012  
 Mean edge weight: 102240  
 Max. degree: 59

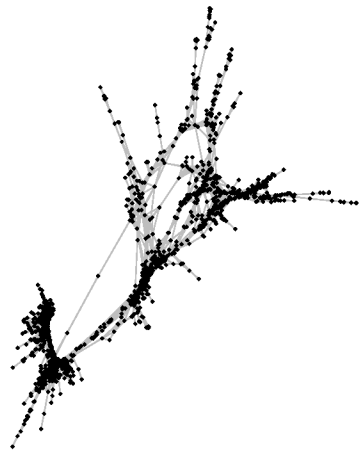

**CL37**

unclassified  
Number of reads:1863 (0.28%)  
Number of pairs: 38286  
Density: 0.02207  
Mean edge weight: 76446  
Max. degree: 233

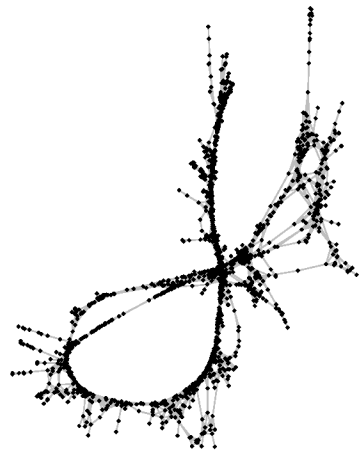

**CL38**

Ty3-gypsy/Tat  
Number of reads:1801 (0.27%)  
Number of pairs: 16573  
Density: 0.01022  
Mean edge weight: 69749  
Max. degree: 67

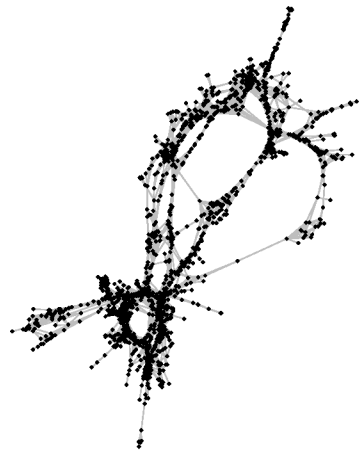

**CL39**

Ty3-gypsy/Tat/Retand  
Number of reads:1794 (0.27%)  
Number of pairs: 14273  
Density: 0.008874  
Mean edge weight: 78892  
Max. degree: 74

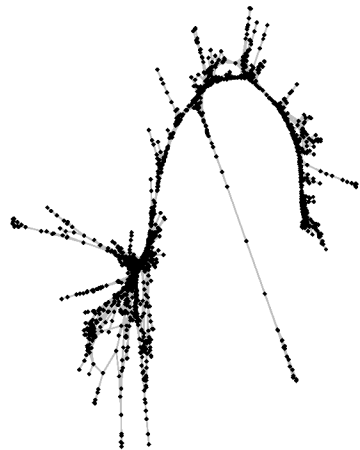

**CL40**

Ty3-gypsy/Ogre  
Number of reads:1788 (0.27%)  
Number of pairs: 21822  
Density: 0.01366  
Mean edge weight: 83203  
Max. degree: 155

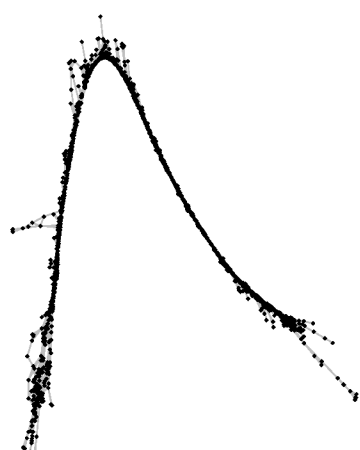

**CL41**

Ty3-gypsy/Tat  
Number of reads:1738 (0.26%)  
Number of pairs: 32122  
Density: 0.02128  
Mean edge weight: 83609  
Max. degree: 68

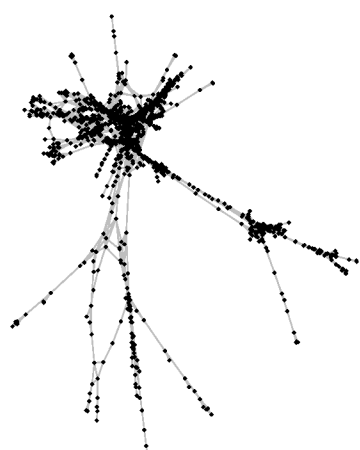

**CL42**

Ty3-gypsy/Athila  
Number of reads:1558 (0.23%)  
Number of pairs: 17993  
Density: 0.01483  
Mean edge weight: 82764  
Max. degree: 101

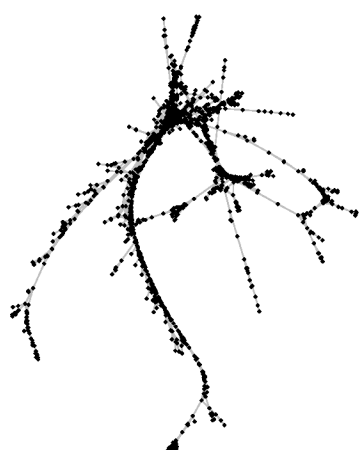

**CL43**

Ty3-gypsy/Athila  
Number of reads:1502 (0.22%)  
Number of pairs: 10415  
Density: 0.009239  
Mean edge weight: 82746  
Max. degree: 84

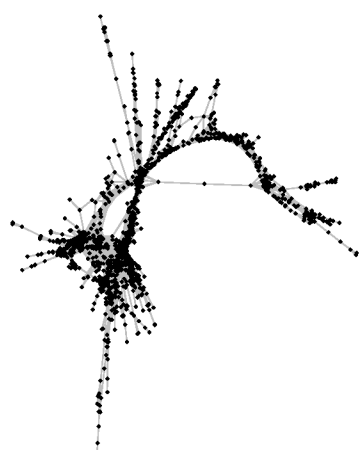

**CL44**

Ty3-gypsy/Athila  
Number of reads:1501 (0.22%)  
Number of pairs: 17485  
Density: 0.01553  
Mean edge weight: 86845  
Max. degree: 152

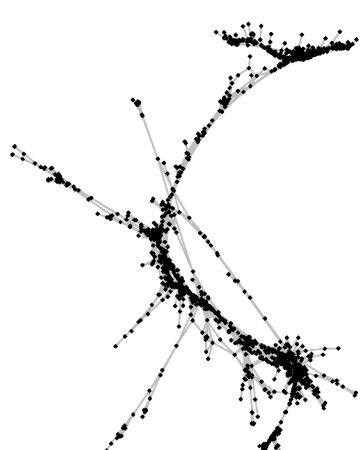

**CL45**

Ty3-gypsy/Tekay  
Number of reads:1491 (0.22%)  
Number of pairs: 11720  
Density: 0.01055  
Mean edge weight: 79598  
Max. degree: 64

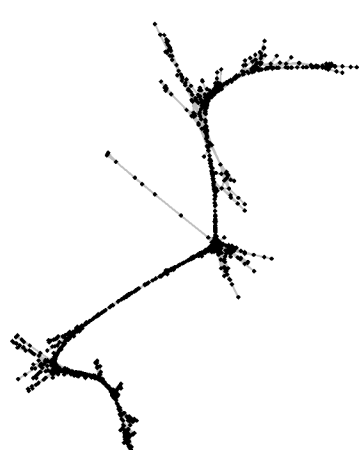

**CL46**

Ty1-copia/Maximus-SIRE  
Number of reads:1445 (0.21%)  
Number of pairs: 14550  
Density: 0.01395  
Mean edge weight: 89049  
Max. degree: 91

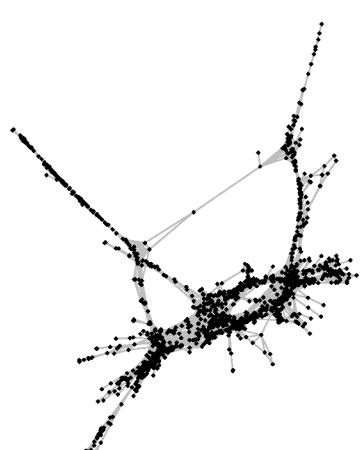

**CL47**

Ty3-gypsy/Athila  
Number of reads:1443 (0.21%)  
Number of pairs: 13457  
Density: 0.01293  
Mean edge weight: 75170  
Max. degree: 80

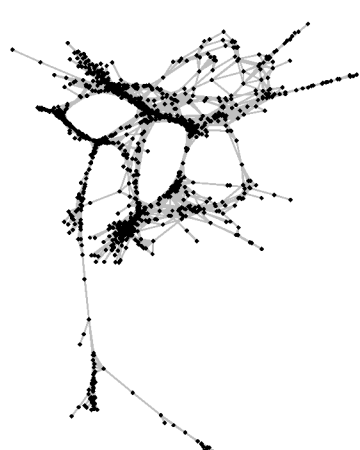

**CL48**

DNA transp/CACTA  
Number of reads:1414 (0.21%)  
Number of pairs: 25279  
Density: 0.0253  
Mean edge weight: 103210  
Max. degree: 133

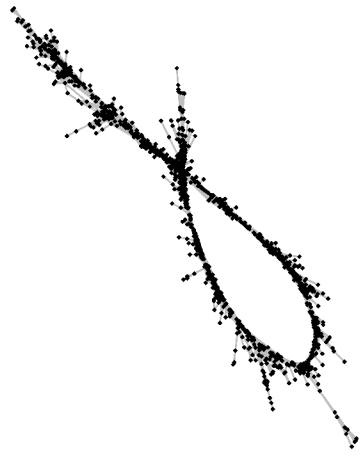

**CL49**

Ty3-gypsy/Ogre  
 Number of reads:1340 (0.2%)  
 Number of pairs: 13999  
 Density: 0.0156  
 Mean edge weight: 73701  
 Max. degree: 83

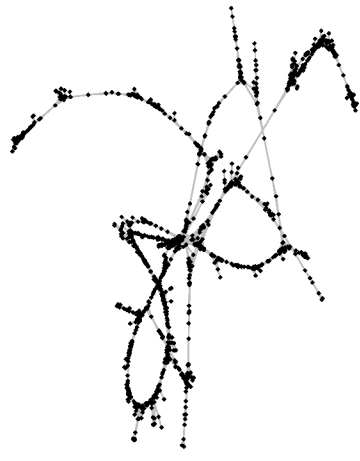

**CL50**

DNA transp/CACTA  
 Number of reads:1302 (0.19%)  
 Number of pairs: 7798  
 Density: 0.009207  
 Mean edge weight: 119210  
 Max. degree: 43

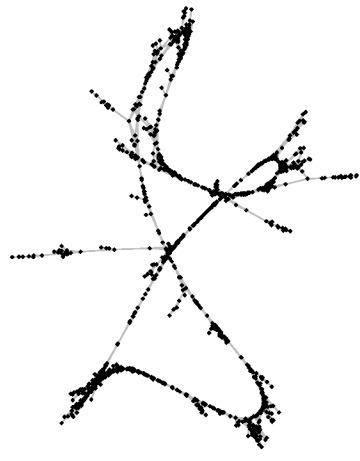

**CL51**

Ty3-gypsy/Tat  
 Number of reads:1289 (0.19%)  
 Number of pairs: 8383  
 Density: 0.0101  
 Mean edge weight: 91571  
 Max. degree: 48

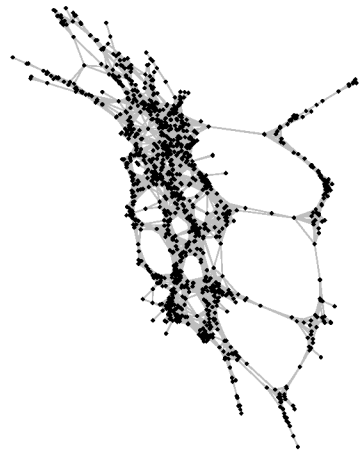

**CL52**

Ty3-gypsy/Athila  
 Number of reads:1201 (0.18%)  
 Number of pairs: 11516  
 Density: 0.01598  
 Mean edge weight: 92523  
 Max. degree: 53

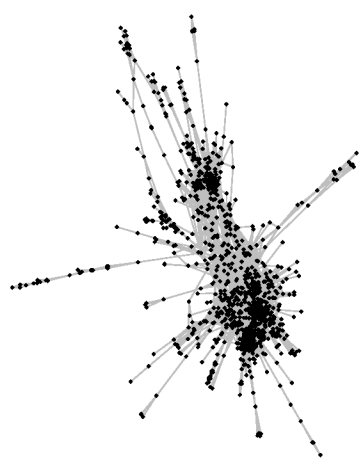

**CL53**

Ty1-copia/Angela  
 Number of reads:1200 (0.18%)  
 Number of pairs: 13353  
 Density: 0.01856  
 Mean edge weight: 77737  
 Max. degree: 114

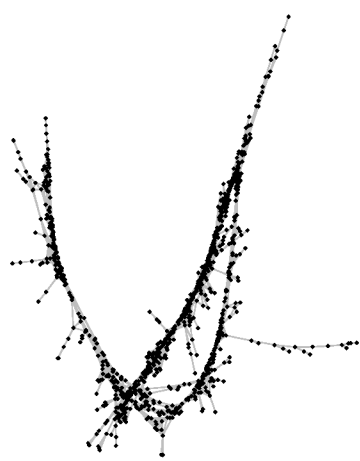

**CL54**

Ty3-gypsy/Tat  
 Number of reads:1193 (0.18%)  
 Number of pairs: 12308  
 Density: 0.01731  
 Mean edge weight: 72553  
 Max. degree: 68

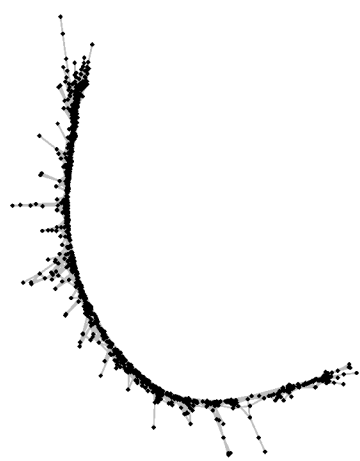

**CL55**

LINE  
 Number of reads:1092 (0.16%)  
 Number of pairs: 19847  
 Density: 0.03332  
 Mean edge weight: 84055  
 Max. degree: 88

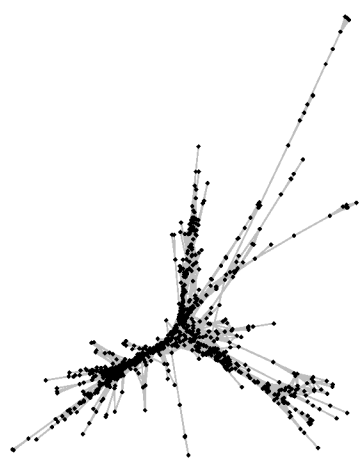

**CL56**

unclassified  
 Number of reads:1018 (0.15%)  
 Number of pairs: 18322  
 Density: 0.03539  
 Mean edge weight: 80903  
 Max. degree: 139

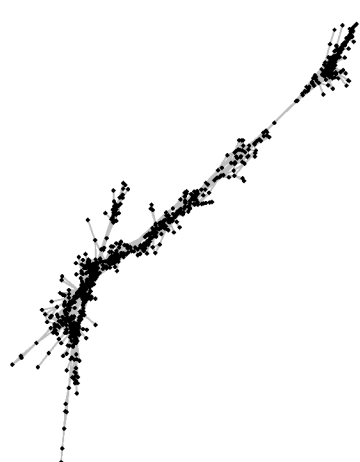

**CL57**

Ty3-gypsy/Ogre  
 Number of reads:961 (0.14%)  
 Number of pairs: 9060  
 Density: 0.01964  
 Mean edge weight: 75288  
 Max. degree: 100

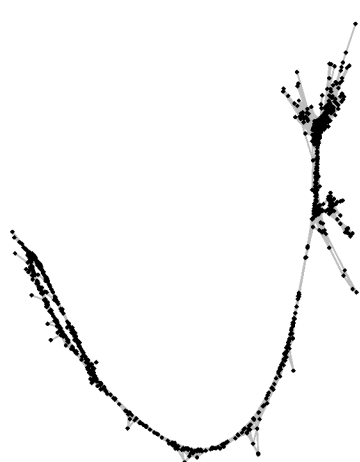

**CL58**

Ty3-gypsy/Tekay  
 Number of reads:944 (0.14%)  
 Number of pairs: 13822  
 Density: 0.03105  
 Mean edge weight: 114340  
 Max. degree: 149

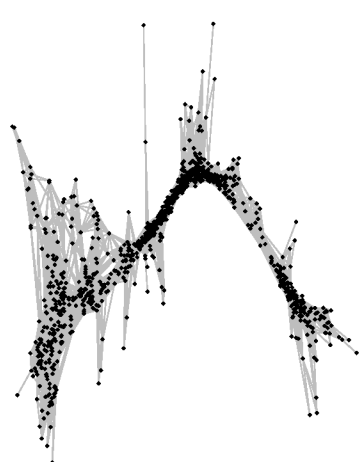

**CL59**

rDNA (IGS)  
 Number of reads:943 (0.14%)  
 Number of pairs: 24958  
 Density: 0.05619  
 Mean edge weight: 122220  
 Max. degree: 113

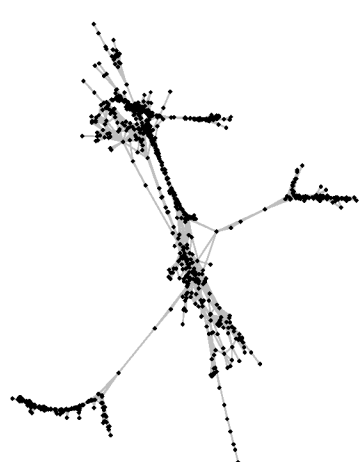

**CL60**

Ty3-gypsy/chrom  
 Number of reads:939 (0.14%)  
 Number of pairs: 7438  
 Density: 0.01689  
 Mean edge weight: 94319  
 Max. degree: 51

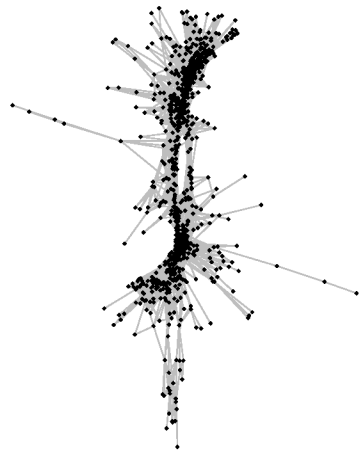

**CL61**

Ty3-gypsy/Ogre  
 Number of reads:930 (0.14%)  
 Number of pairs: 19670  
 Density: 0.04553  
 Mean edge weight: 84966  
 Max. degree: 137

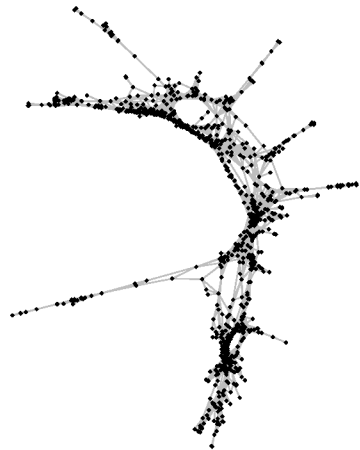

**CL62**

Ty3-gypsy/Tekay  
 Number of reads:928 (0.14%)  
 Number of pairs: 7613  
 Density: 0.0177  
 Mean edge weight: 86958  
 Max. degree: 62

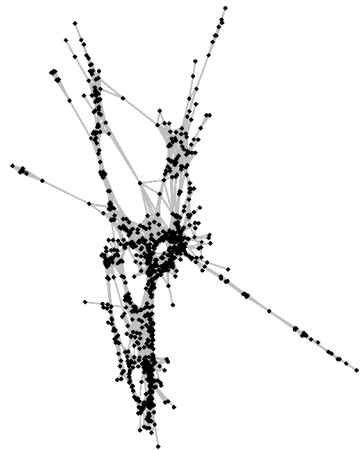

**CL63**

Ty3-gypsy/Athila  
 Number of reads:916 (0.14%)  
 Number of pairs: 7640  
 Density: 0.01823  
 Mean edge weight: 91083  
 Max. degree: 63

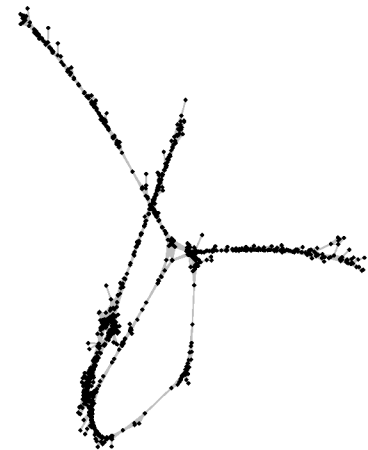

**CL64**

DNA transp/CACTA  
 Number of reads:901 (0.13%)  
 Number of pairs: 6714  
 Density: 0.01656  
 Mean edge weight: 86868  
 Max. degree: 47

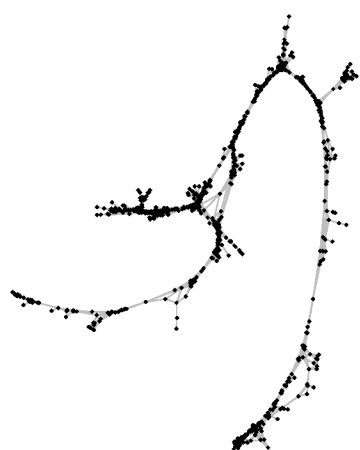

**CL65**

Ty1-copia  
 Number of reads:890 (0.13%)  
 Number of pairs: 7881  
 Density: 0.01992  
 Mean edge weight: 105880  
 Max. degree: 58

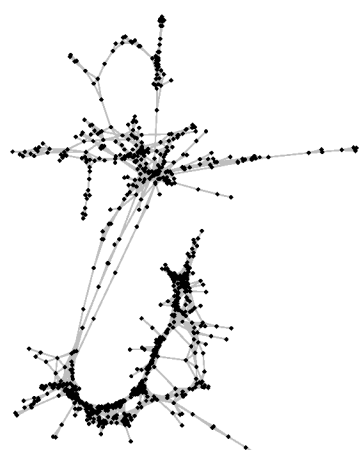

**CL66**

Ty3-gypsy/Tat  
 Number of reads:872 (0.13%)  
 Number of pairs: 5450  
 Density: 0.01435  
 Mean edge weight: 84891  
 Max. degree: 52

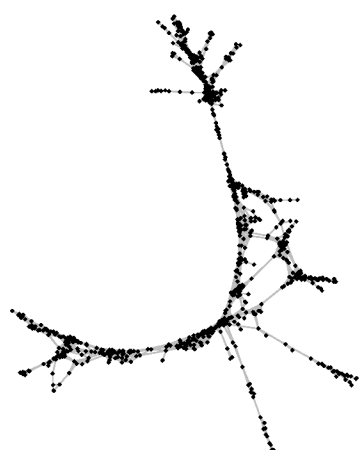

**CL67**

Ty3-gypsy/Athila  
 Number of reads:868 (0.13%)  
 Number of pairs: 5379  
 Density: 0.0143  
 Mean edge weight: 86692  
 Max. degree: 49

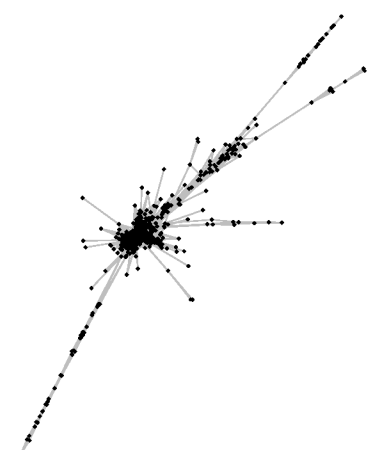

**CL68**

satellite/TRAYC-like  
 Number of reads:866 (0.13%)  
 Number of pairs: 70378  
 Density: 0.1879  
 Mean edge weight: 66130  
 Max. degree: 463

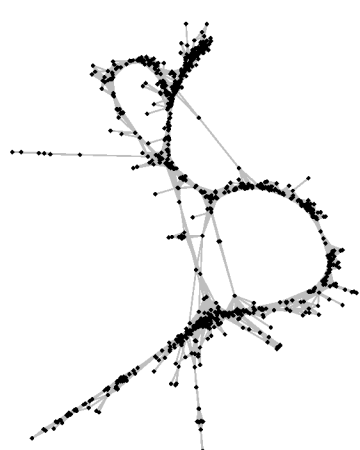

**CL69**

unclassified  
 Number of reads:848 (0.13%)  
 Number of pairs: 9814  
 Density: 0.02733  
 Mean edge weight: 100250  
 Max. degree: 66

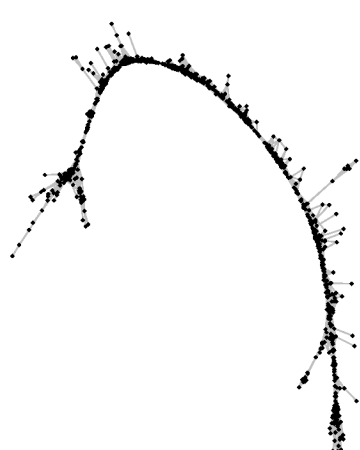

**CL70**

Ty3-gypsy/Athila  
 Number of reads:843 (0.13%)  
 Number of pairs: 12159  
 Density: 0.03426  
 Mean edge weight: 93528  
 Max. degree: 58

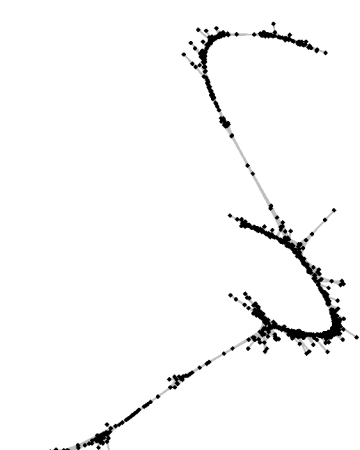

**CL71**

DNA transp/CACTA  
 Number of reads:841 (0.13%)  
 Number of pairs: 9755  
 Density: 0.02762  
 Mean edge weight: 85648  
 Max. degree: 68

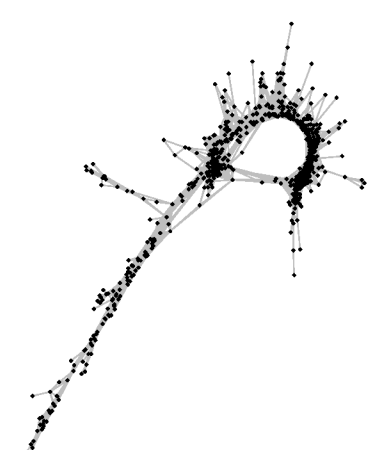

**CL72**

unclassified  
 Number of reads:728 (0.11%)  
 Number of pairs: 14620  
 Density: 0.05525  
 Mean edge weight: 87173  
 Max. degree: 137

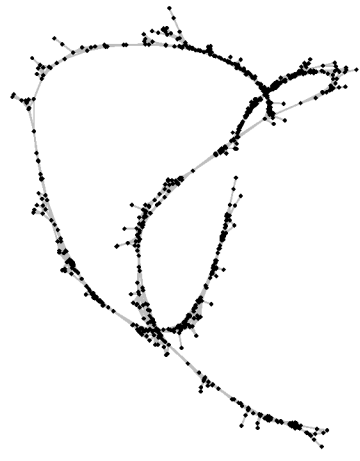

**CL73**

unclassified  
 Number of reads:720 (0.11%)  
 Number of pairs: 4481  
 Density: 0.01731  
 Mean edge weight: 99737  
 Max. degree: 33

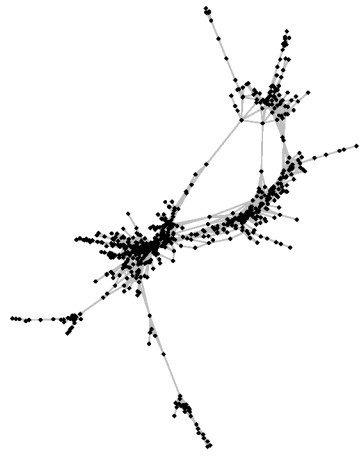

**CL74**

unclassified  
 Number of reads:701 (0.1%)  
 Number of pairs: 3716  
 Density: 0.01515  
 Mean edge weight: 64952  
 Max. degree: 92

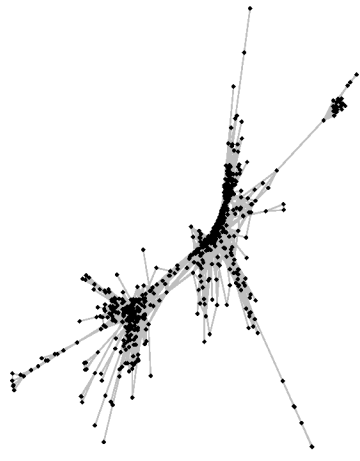

**CL75**

Ty3-gypsy/Athila  
 Number of reads:670 (0.1%)  
 Number of pairs: 12896  
 Density: 0.05754  
 Mean edge weight: 78330  
 Max. degree: 129

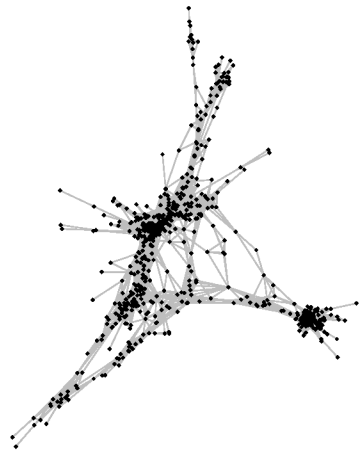

**CL76**

Ty3-gypsy/Ogre  
 Number of reads:651 (0.097%)  
 Number of pairs: 7226  
 Density: 0.03415  
 Mean edge weight: 57031  
 Max. degree: 106

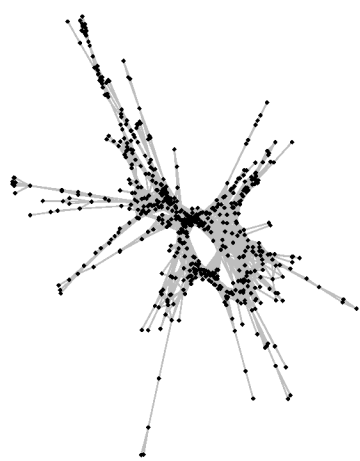

**CL77**

Ty3-gypsy/Athila  
 Number of reads:629 (0.094%)  
 Number of pairs: 6223  
 Density: 0.03151  
 Mean edge weight: 93853  
 Max. degree: 83

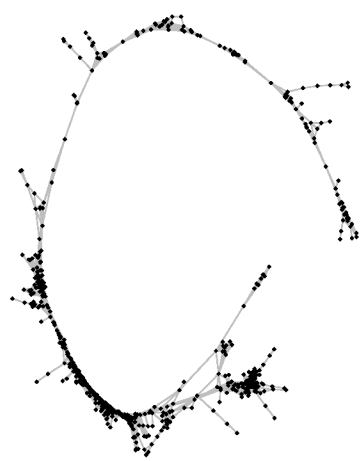

**CL78**

Ty3-gypsy/Athila  
 Number of reads:625 (0.093%)  
 Number of pairs: 6031  
 Density: 0.03093  
 Mean edge weight: 82020  
 Max. degree: 58

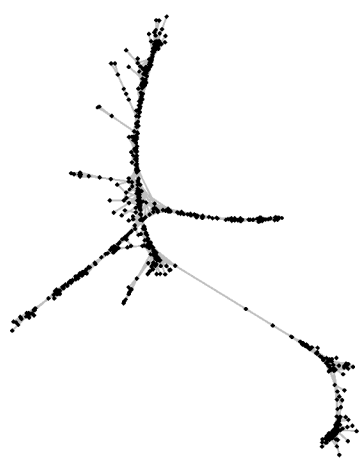

**CL79**

Ty1-copia/Maximus-SIRE  
 Number of reads:603 (0.09%)  
 Number of pairs: 4599  
 Density: 0.02534  
 Mean edge weight: 87588  
 Max. degree: 35

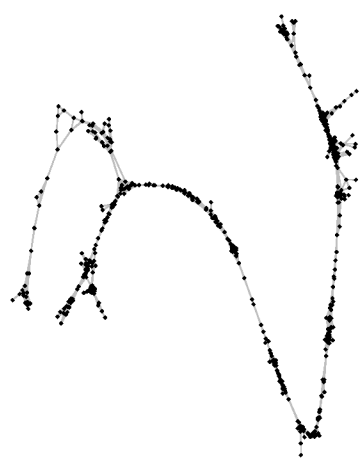

**CL80**

Ty3-gypsy/chrom/CRM  
 Number of reads:583 (0.087%)  
 Number of pairs: 3810  
 Density: 0.02246  
 Mean edge weight: 102170  
 Max. degree: 32

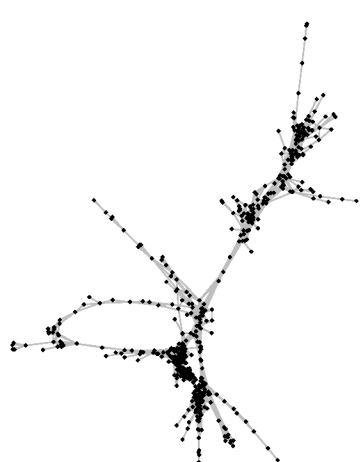

**CL81**

Ty1-copia/Angela  
 Number of reads:581 (0.086%)  
 Number of pairs: 4016  
 Density: 0.02384  
 Mean edge weight: 89507  
 Max. degree: 45

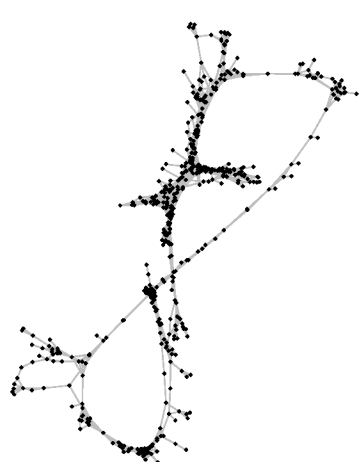

**CL82**

Ty3-gypsy/Athila  
 Number of reads:554 (0.082%)  
 Number of pairs: 3413  
 Density: 0.02228  
 Mean edge weight: 81109  
 Max. degree: 60

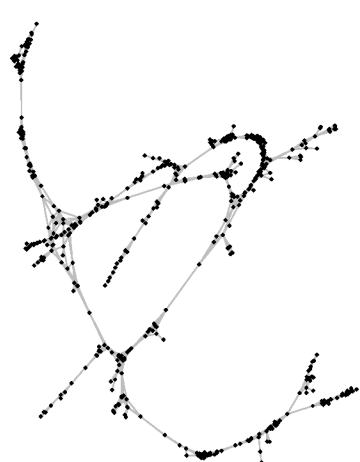

**CL83**

Ty3-gypsy/chrom/CRM  
 Number of reads:534 (0.079%)  
 Number of pairs: 2455  
 Density: 0.01725  
 Mean edge weight: 120610  
 Max. degree: 25

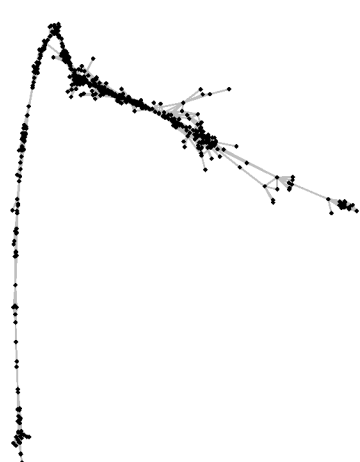

**CL84**

LINE  
 Number of reads:510 (0.076%)  
 Number of pairs: 4435  
 Density: 0.03417  
 Mean edge weight: 100130  
 Max. degree: 48

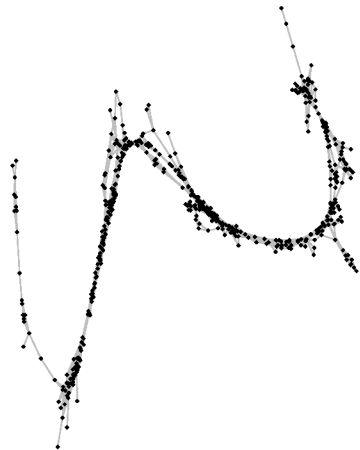

**CL85**

Ty1-copia/TAR  
 Number of reads:508 (0.076%)  
 Number of pairs: 3494  
 Density: 0.02713  
 Mean edge weight: 94178  
 Max. degree: 40

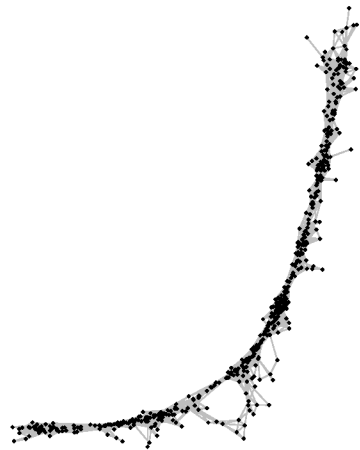

**CL86**

unclassified  
 Number of reads:499 (0.074%)  
 Number of pairs: 5931  
 Density: 0.04773  
 Mean edge weight: 78689  
 Max. degree: 62

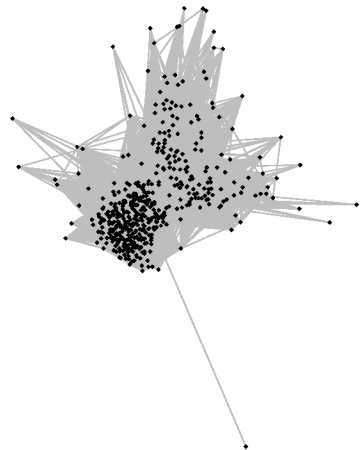

**CL87**

satellite (15Ssp)  
 Number of reads:493 (0.073%)  
 Number of pairs: 52280  
 Density: 0.4311  
 Mean edge weight: 72428  
 Max. degree: 382

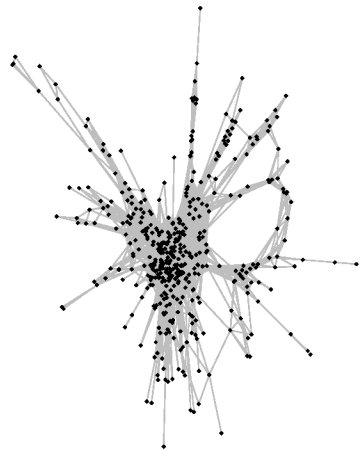

**CL88**

unclassified  
 Number of reads:451 (0.067%)  
 Number of pairs: 5145  
 Density: 0.0507  
 Mean edge weight: 90470  
 Max. degree: 101

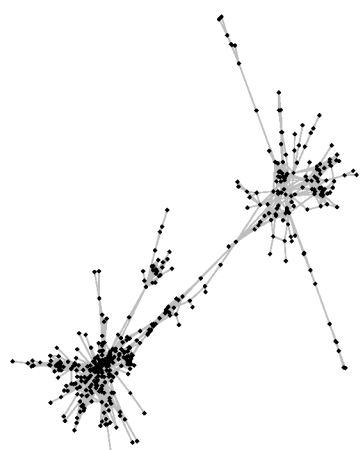

**CL89**

Ty3-gypsy/Ogre  
 Number of reads:450 (0.067%)  
 Number of pairs: 1858  
 Density: 0.01839  
 Mean edge weight: 73267  
 Max. degree: 48

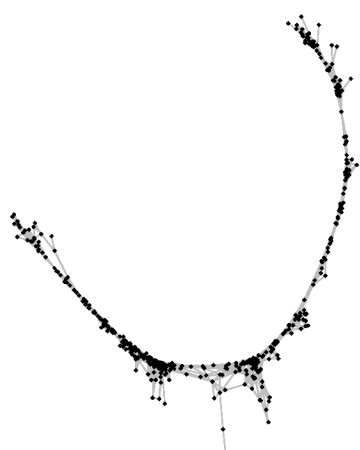

**CL90**

Ty1-copia/Maximus-SIRE  
 Number of reads:417 (0.062%)  
 Number of pairs: 3998  
 Density: 0.04609  
 Mean edge weight: 107010  
 Max. degree: 53

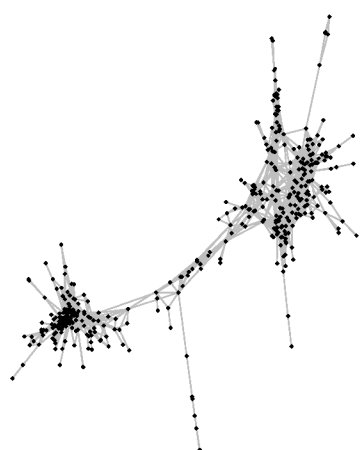

**CL91**

Ty1-copia/Angela  
 Number of reads:409 (0.061%)  
 Number of pairs: 2256  
 Density: 0.02704  
 Mean edge weight: 81873  
 Max. degree: 60

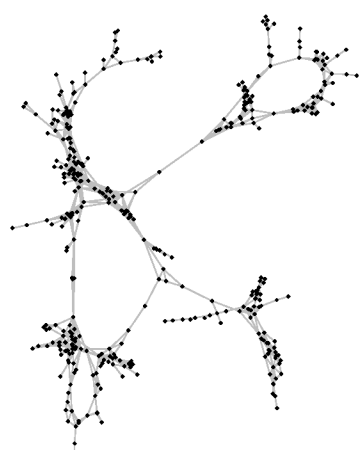

**CL92**

unclassified  
 Number of reads:397 (0.059%)  
 Number of pairs: 1116  
 Density: 0.0142  
 Mean edge weight: 89377  
 Max. degree: 25

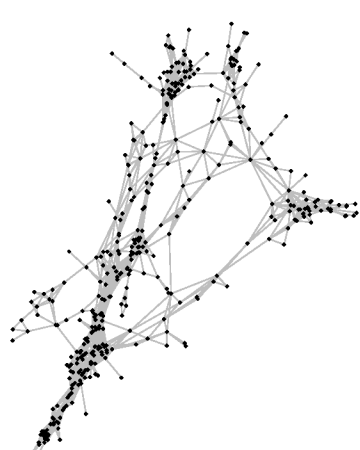

**CL93**

Ty3-gypsy/Ogre  
 Number of reads:397 (0.059%)  
 Number of pairs: 1609  
 Density: 0.02047  
 Mean edge weight: 76238  
 Max. degree: 32

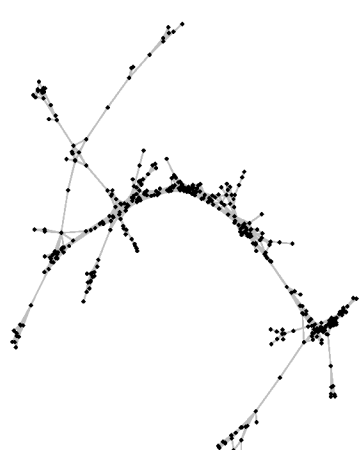

**CL94**

unclassified  
 Number of reads:391 (0.058%)  
 Number of pairs: 1773  
 Density: 0.02325  
 Mean edge weight: 91780  
 Max. degree: 31

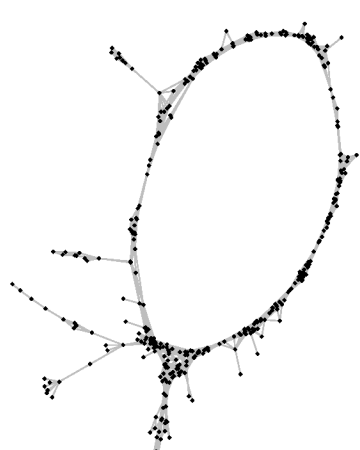

**CL95**

Ty3-gypsy/chrom  
 Number of reads:367 (0.055%)  
 Number of pairs: 2456  
 Density: 0.03657  
 Mean edge weight: 103390  
 Max. degree: 29

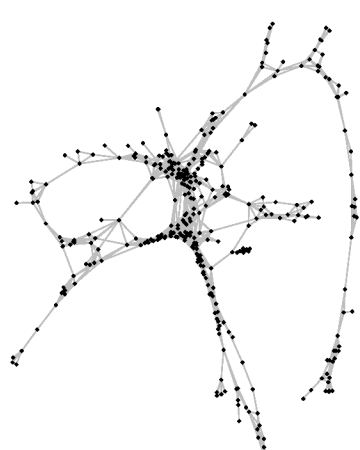

**CL96**

Ty3-gypsy/Athila  
 Number of reads:366 (0.054%)  
 Number of pairs: 1877  
 Density: 0.0281  
 Mean edge weight: 110690  
 Max. degree: 40



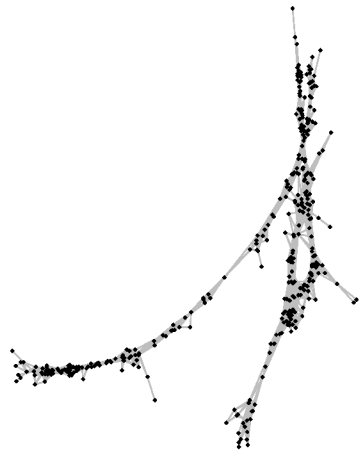

**CL97**

unclassified  
 Number of reads:361 (0.054%)  
 Number of pairs: 2384  
 Density: 0.03669  
 Mean edge weight: 97663  
 Max. degree: 35

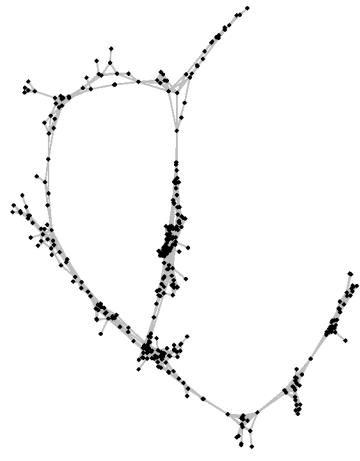

**CL98**

Ty3-gypsy/Athila  
 Number of reads:359 (0.053%)  
 Number of pairs: 1439  
 Density: 0.02239  
 Mean edge weight: 72480  
 Max. degree: 24

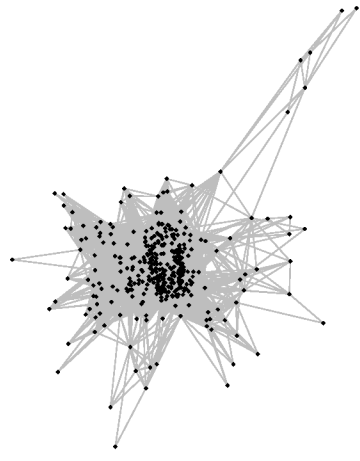

**CL99**

rDNA/5S  
 Number of reads:352 (0.052%)  
 Number of pairs: 17894  
 Density: 0.2897  
 Mean edge weight: 105420  
 Max. degree: 181

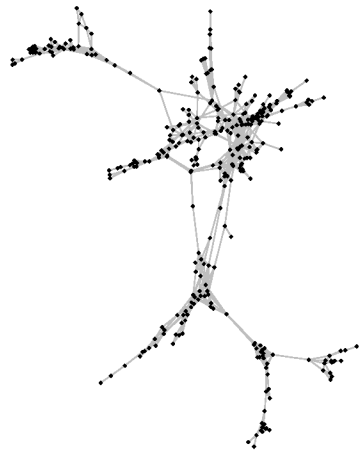

**CL100**

unclassified  
 Number of reads:351 (0.052%)  
 Number of pairs: 1096  
 Density: 0.01784  
 Mean edge weight: 106720  
 Max. degree: 23

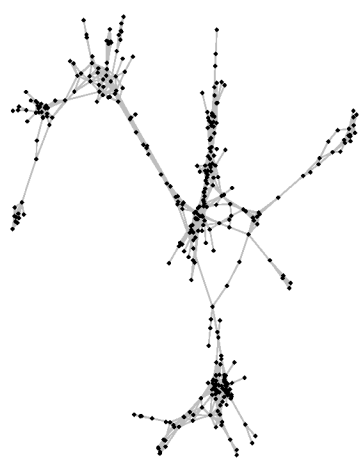

**CL101**

Ty3-gypsy/chrom  
 Number of reads:347 (0.052%)  
 Number of pairs: 1019  
 Density: 0.01697  
 Mean edge weight: 67494  
 Max. degree: 23

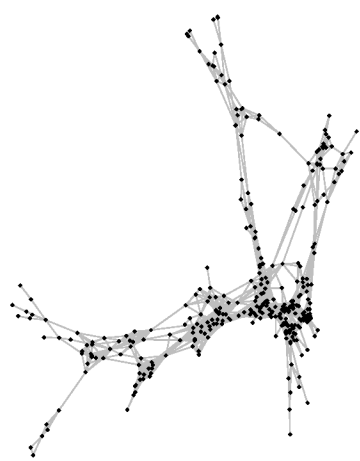

**CL102**

unclassified  
 Number of reads:334 (0.05%)  
 Number of pairs: 1704  
 Density: 0.03064  
 Mean edge weight: 95403  
 Max. degree: 30

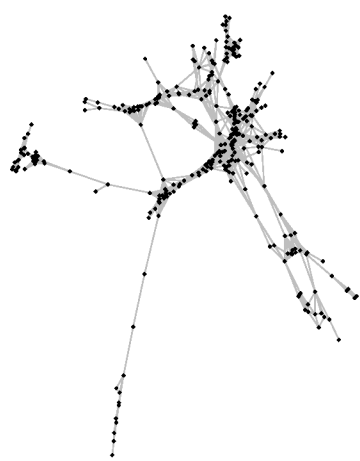

**CL103**

unclassified  
 Number of reads:320 (0.048%)  
 Number of pairs: 1697  
 Density: 0.03325  
 Mean edge weight: 83379  
 Max. degree: 36

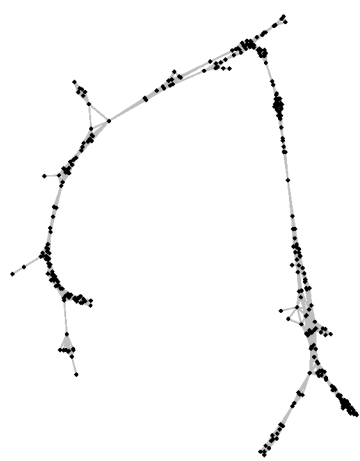

**CL104**

Ty3-gypsy/Tekay  
 Number of reads:317 (0.047%)  
 Number of pairs: 1728  
 Density: 0.0345  
 Mean edge weight: 107410  
 Max. degree: 22

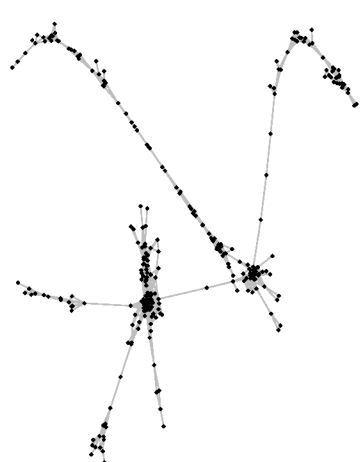

**CL105**

DNA transp/Mutator  
 Number of reads:310 (0.046%)  
 Number of pairs: 1841  
 Density: 0.03844  
 Mean edge weight: 82717  
 Max. degree: 48

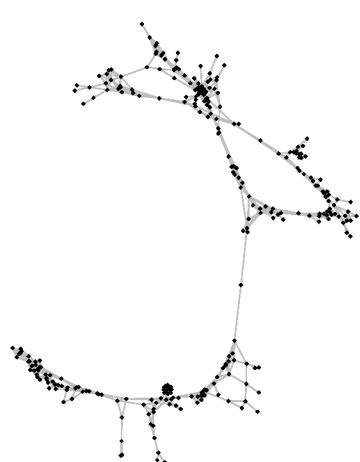

**CL106**

Ty3-gypsy/Athila  
 Number of reads:307 (0.046%)  
 Number of pairs: 930  
 Density: 0.0198  
 Mean edge weight: 86413  
 Max. degree: 17

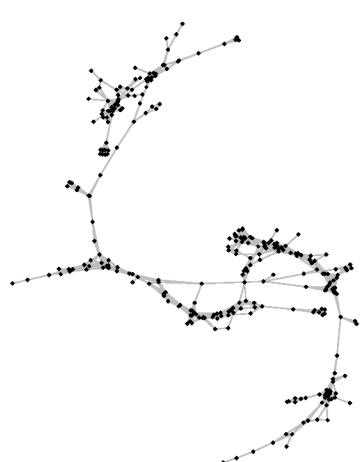

**CL107**

unclassified  
 Number of reads:299 (0.044%)  
 Number of pairs: 1030  
 Density: 0.02312  
 Mean edge weight: 104110  
 Max. degree: 19

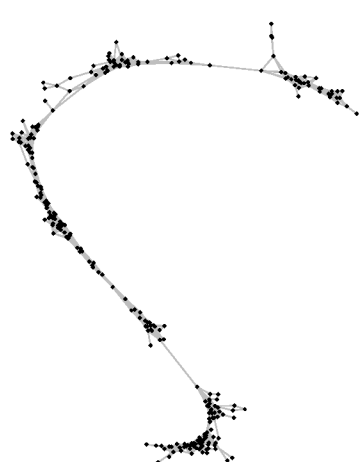

**CL108**

unclassified  
 Number of reads:279 (0.041%)  
 Number of pairs: 1540  
 Density: 0.03971  
 Mean edge weight: 88794  
 Max. degree: 31

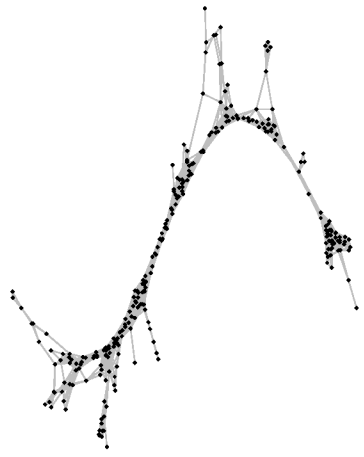

**CL109**

Ty3-gypsy/Athila  
 Number of reads:274 (0.041%)  
 Number of pairs: 1800  
 Density: 0.04813  
 Mean edge weight: 81047  
 Max. degree: 29

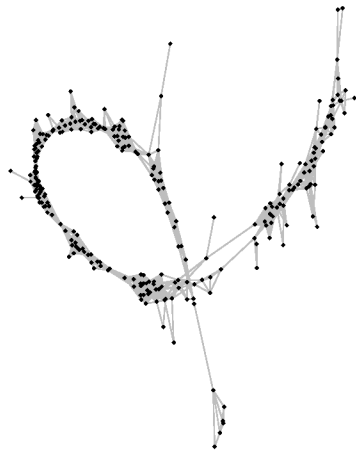

**CL110**

DNA transp/Mutator  
 Number of reads:270 (0.04%)  
 Number of pairs: 1679  
 Density: 0.04623  
 Mean edge weight: 100930  
 Max. degree: 29

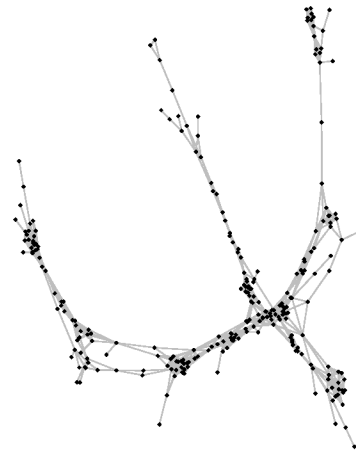

**CL111**

unclassified  
 Number of reads:261 (0.039%)  
 Number of pairs: 1021  
 Density: 0.03009  
 Mean edge weight: 99400  
 Max. degree: 23

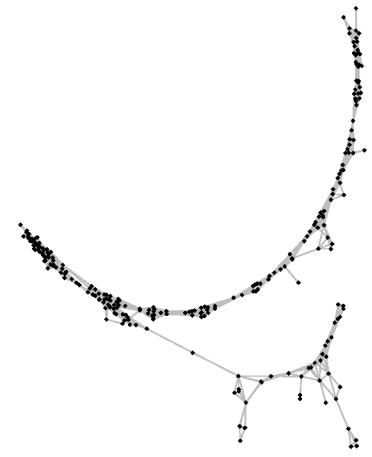

**CL112**

DNA transp/Mutator  
 Number of reads:261 (0.039%)  
 Number of pairs: 1315  
 Density: 0.03876  
 Mean edge weight: 97764  
 Max. degree: 20

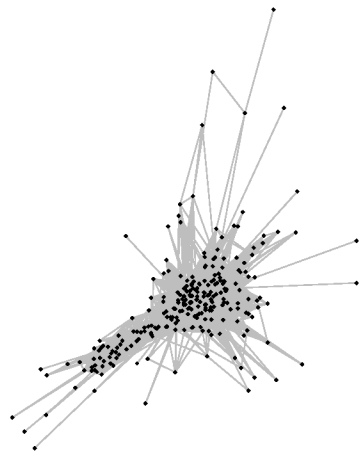

**CL113**

TRIM  
 Number of reads:252 (0.037%)  
 Number of pairs: 5835  
 Density: 0.1845  
 Mean edge weight: 80827  
 Max. degree: 129

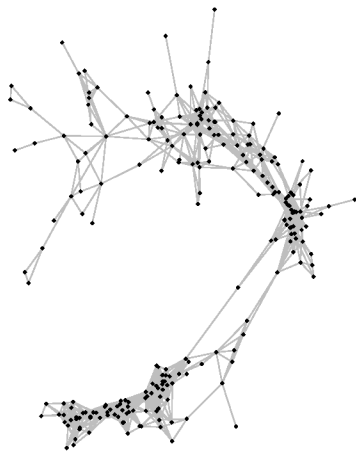

**CL114**

unclassified  
 Number of reads:237 (0.035%)  
 Number of pairs: 1192  
 Density: 0.04262  
 Mean edge weight: 85770  
 Max. degree: 32

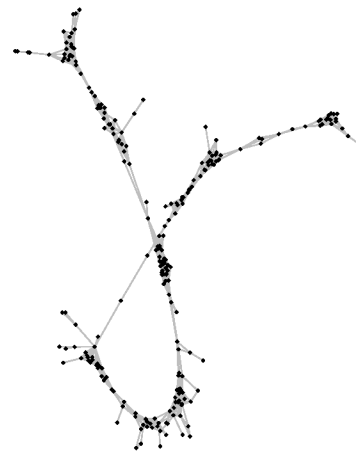

**CL115**

Ty3-gypsy/Athila  
 Number of reads:235 (0.035%)  
 Number of pairs: 1154  
 Density: 0.04197  
 Mean edge weight: 87672  
 Max. degree: 29

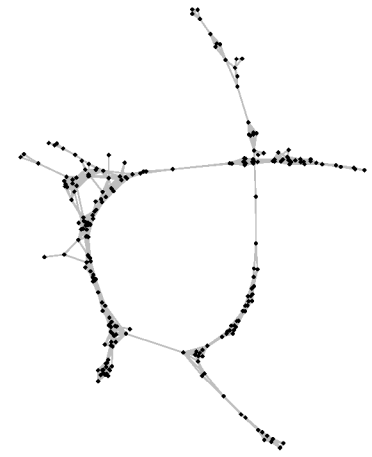

**CL116**

Ty1-copia/Maximus-SIRE  
 Number of reads:234 (0.035%)  
 Number of pairs: 1168  
 Density: 0.04285  
 Mean edge weight: 108200  
 Max. degree: 22

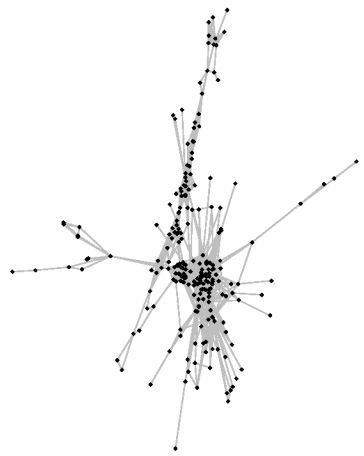

**CL117**

unclassified  
 Number of reads:228 (0.034%)  
 Number of pairs: 1328  
 Density: 0.05132  
 Mean edge weight: 96675  
 Max. degree: 68

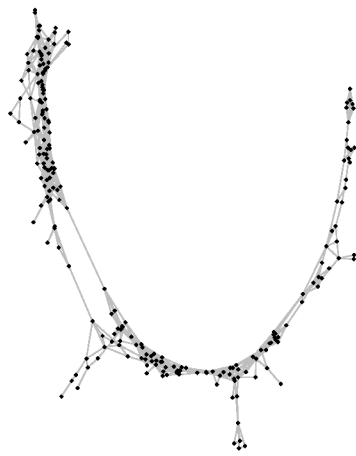

**CL118**

Ty1-copia/Angela  
 Number of reads:228 (0.034%)  
 Number of pairs: 790  
 Density: 0.03053  
 Mean edge weight: 73693  
 Max. degree: 23

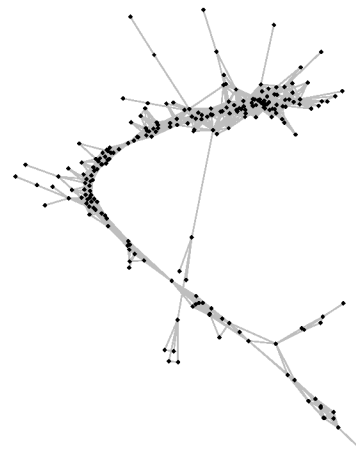

**CL119**

LINE  
 Number of reads:226 (0.034%)  
 Number of pairs: 1507  
 Density: 0.05927  
 Mean edge weight: 95684  
 Max. degree: 41

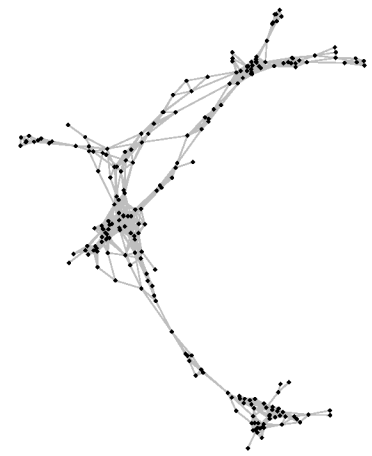

**CL120**

unclassified  
 Number of reads:222 (0.033%)  
 Number of pairs: 1021  
 Density: 0.04162  
 Mean edge weight: 86117  
 Max. degree: 27
