# Supplementary material for: Next Generation Sequencing-Based Analysis of Repetitive DNA in the Model Dioceous Plant Silene latifolia
Source: PubMed Central journal article supplement (PMC3212565; doi:10.1371/journal.pone.0027335), 2011-11-09
Supplement: pone.0027335.s002.pdf [file pone.0027335.s002.pdf]

**A**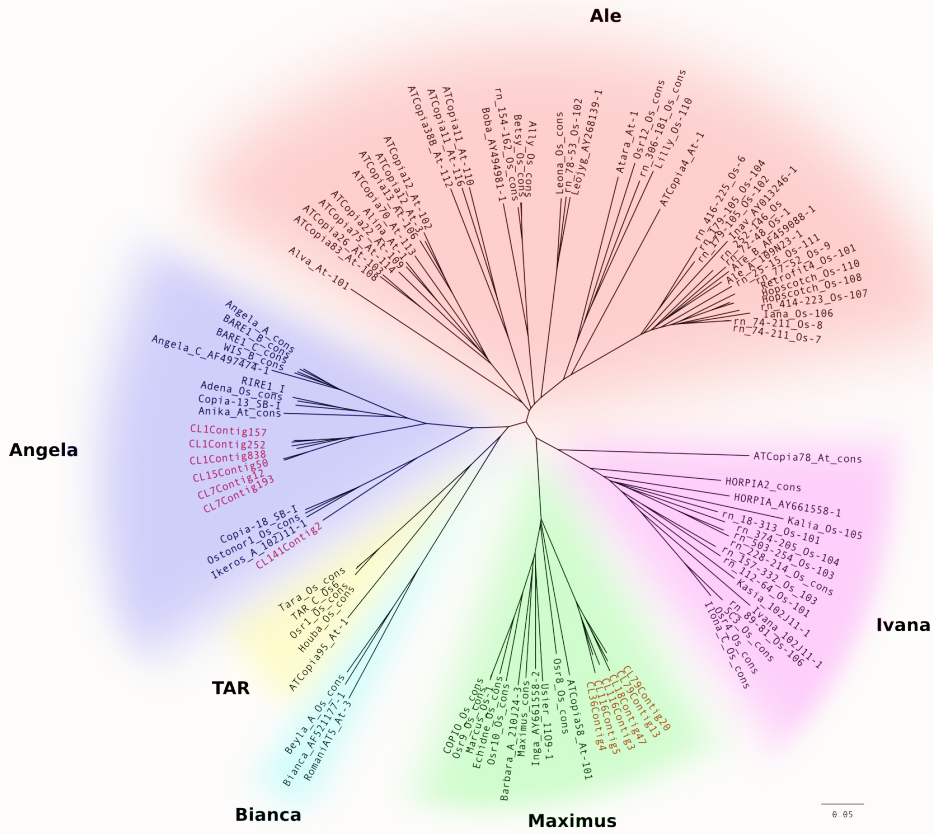**B**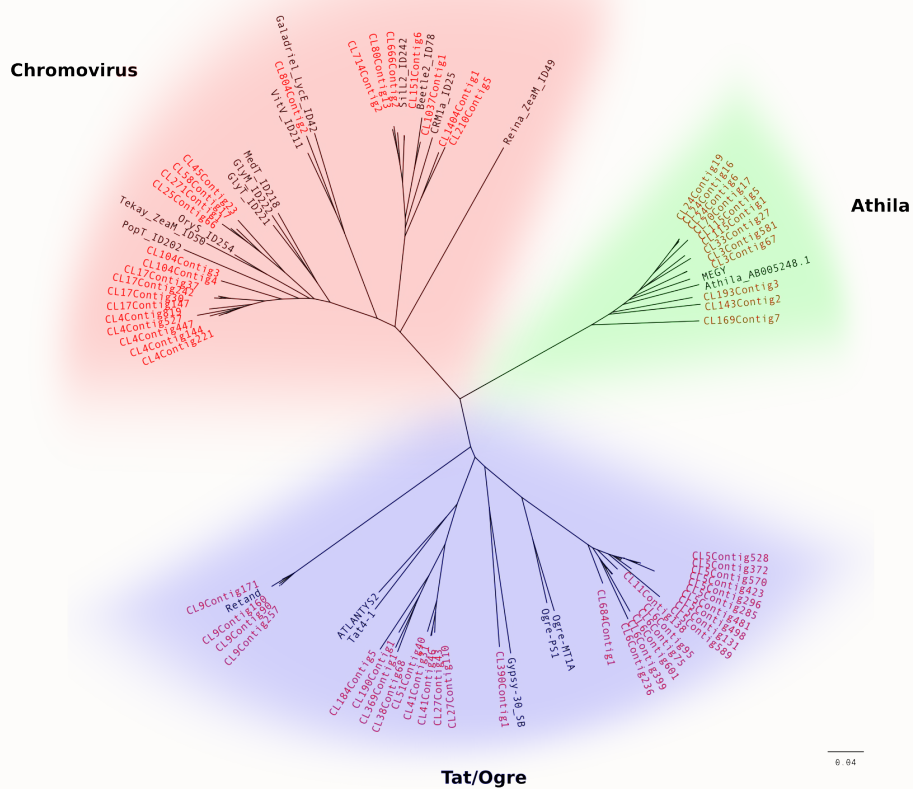

**Figure S2.** Phylogenetic analysis of *Silene latifolia* retrotransposons based on RT sequences. Unrooted phylogenetic trees of Ty1/copia elements (**A**) and Ty3/gypsy elements (**B**). Contigs assembled from 454 reads are highlighted and their names indicate cluster (CL) of origin.
